# Supplementary material for: Mussel-inspired polydopamine chemistry to modulate template synthesis of 1D metal–organic framework superstructures
Source: Royal Society of Chemistry journal article supplement (doi:10.1039/c8ta08514e), 2018-01-01
Supplement: c8ta08514e1.pdf [file c8ta08514e1.pdf]

## Electronic Supplementary Information

### **Mussel-Inspired Polydopamine Chemistry to Modulate Template Synthesis of 1D Metal-Organic Framework Superstructures**

Boxuan Yu,<sup>ac</sup> Gang Ye,<sup>\*ab</sup> Zhen Zeng,<sup>a</sup> Lei Zhang,<sup>a</sup> Jing Chen<sup>\*ab</sup> and Shengqian Ma<sup>\*c</sup>

<sup>a</sup>Collaborative Innovation Center of Advanced Nuclear Energy Technology, Institute of Nuclear and New Energy Technology, Tsinghua University, Beijing, 100084, China

<sup>b</sup>Beijing Key Lab of Radioactive Waste Treatment, Tsinghua University, Beijing 100084, China

<sup>c</sup>Department of Chemistry, University of South Florida, 4202 E. Fowler Avenue, Tampa, FL 33620, United States

Email: yegang@mail.tsinghua.edu.cn (G. Ye); jingxia@mail.tsinghua.edu.cn (J. Chen); sqma@usf.edu. (S. Ma)

Supporting Figures

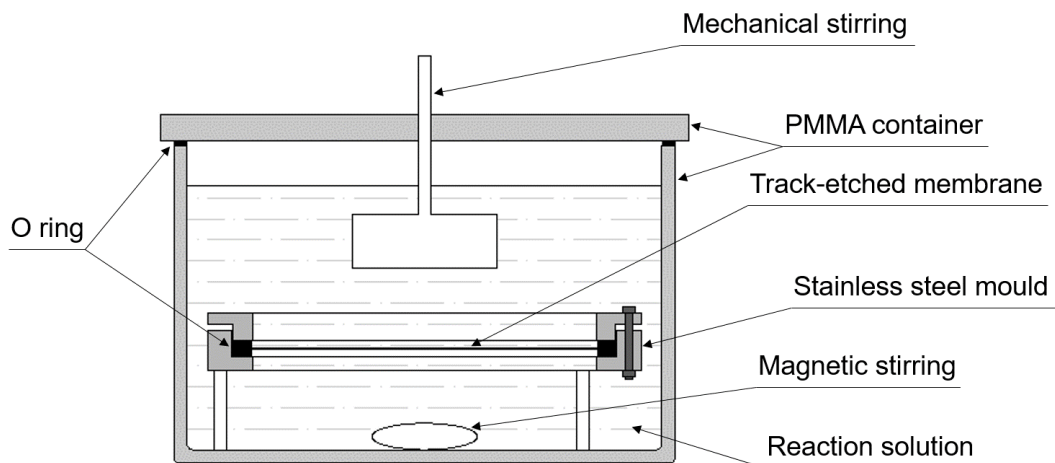

**Fig. S1.** Schematic diagram of the PDA modification unit.

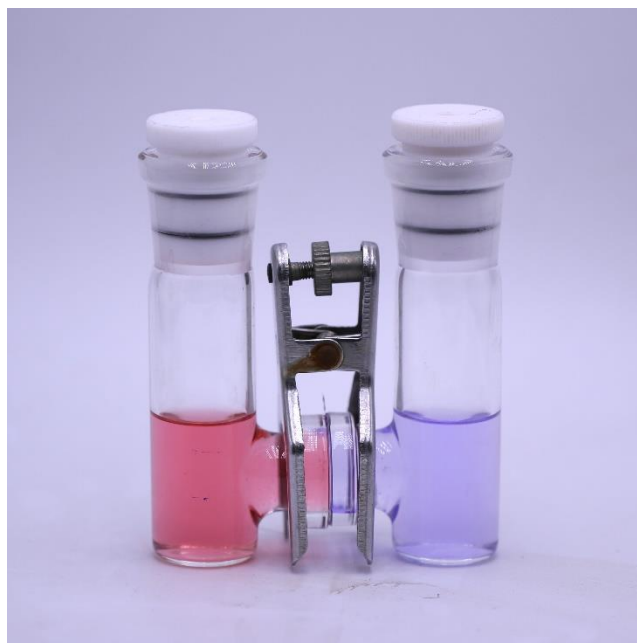

**Fig. S2.** Photograph of the contra-diffusion reaction setup for template synthesis of MOFs

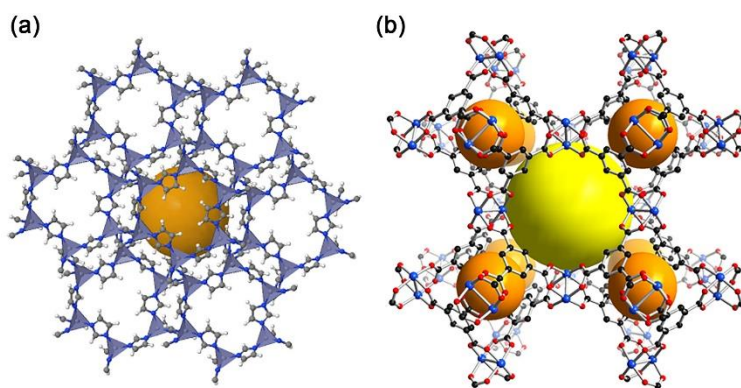

**Fig. S3.** Coordination structure of (a) ZIF-8 and (b) HKUST-1. CIF files were obtained via the Crystallography Open Database.

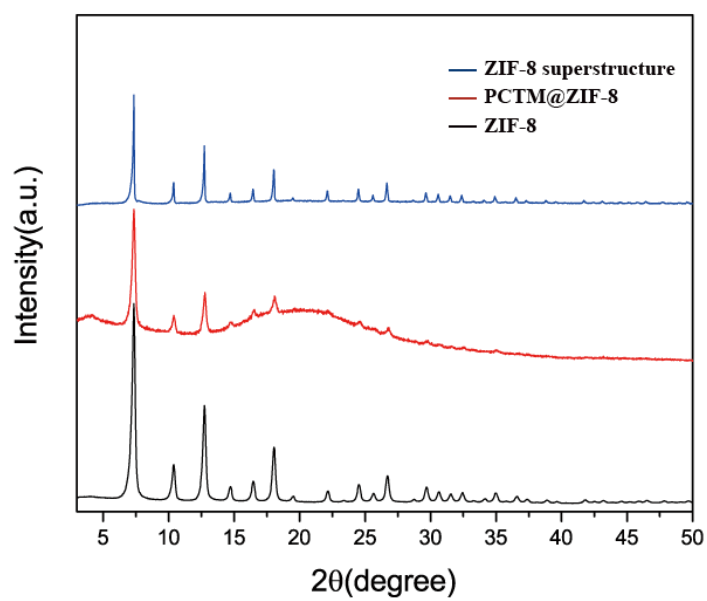

**Fig. S4.** XRD patterns of conventional ZIF-8 crystal (black), ZIF-8 deposited PCTM (red) and isolated 1D ZIF-8 superstructures (blue).

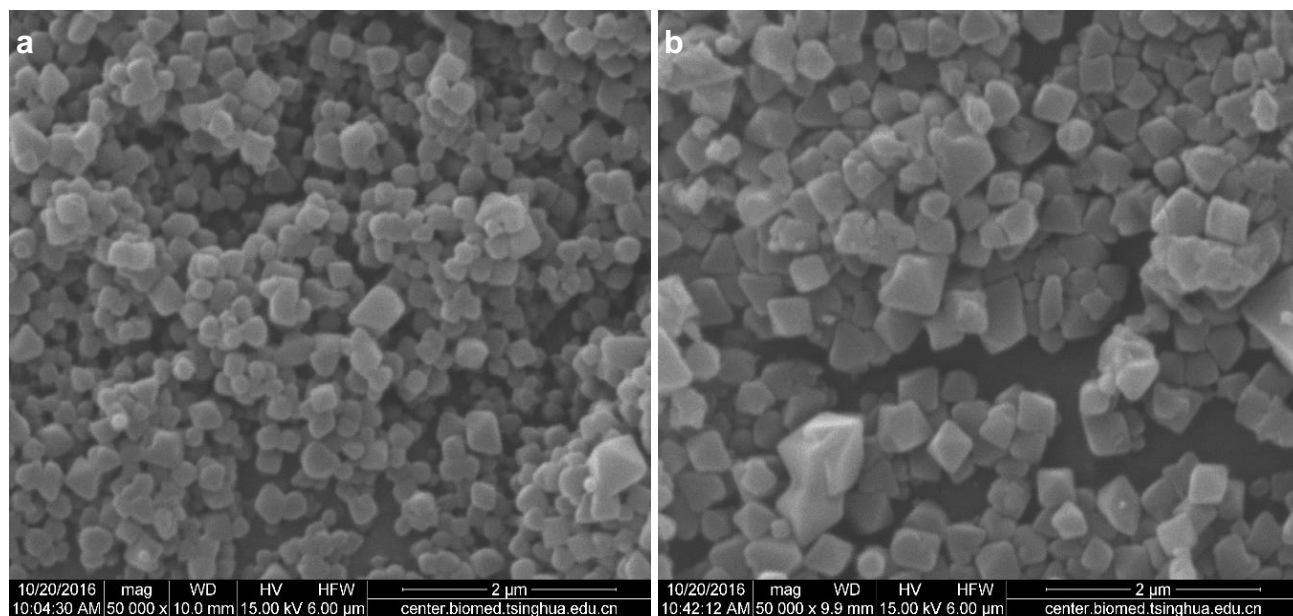

**Fig. S5.** SEM images of (a) ZIF-8 and (b) HKUST-1 crystals by solution synthesis under the experimental conditions. An average size of 100 nm and 350 nm was estimated for ZIF-8 and HKUST-1 crystals, respectively.

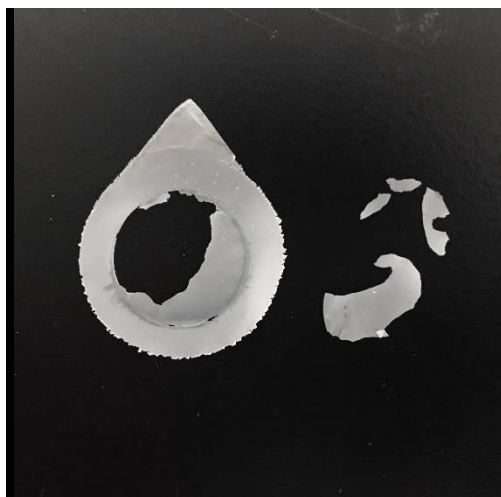

**Fig. S6.** Photograph of fractured ZIF-8 composite membrane after 6 h contra-diffusion synthesis.

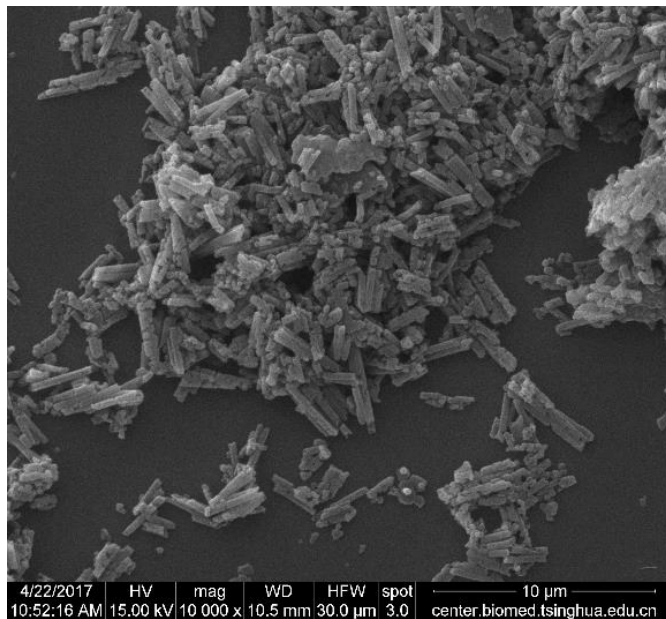

**Fig. S7.** SEM image of fractured 1D ZIF-8 superstructures.



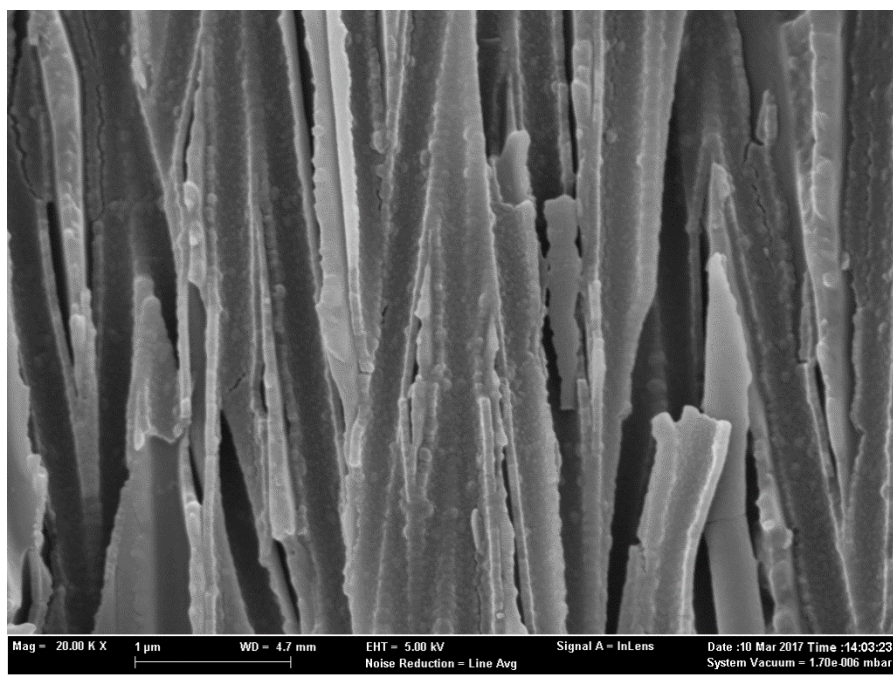

**Fig. S8.** Section view SEM image of ZIF-8 deposited PCTM@PDA.

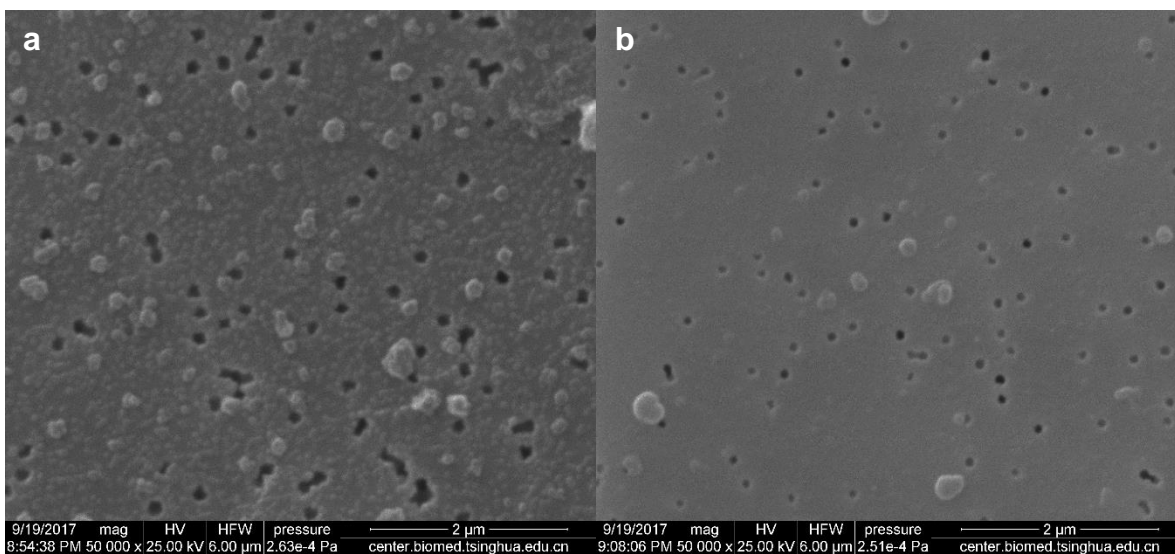

**Fig. S9.** Surfaces of PDA modified PCTM after contra-diffusion synthesis of ZIF-8: (a) the surface toward zinc solution, (b) the surface toward mIM solution.

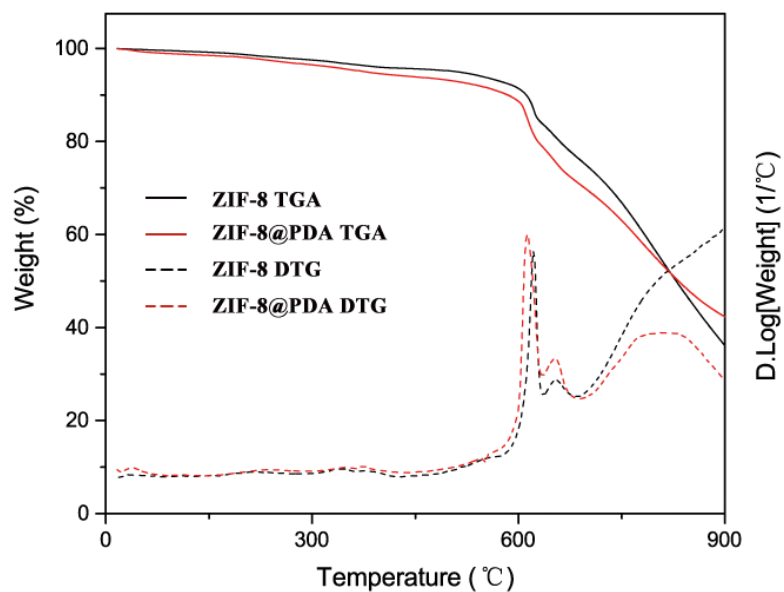

**Fig. S10.** TGA curves and DTG plots of ZIF-8 and ZIF-8@PDA nanotubes.

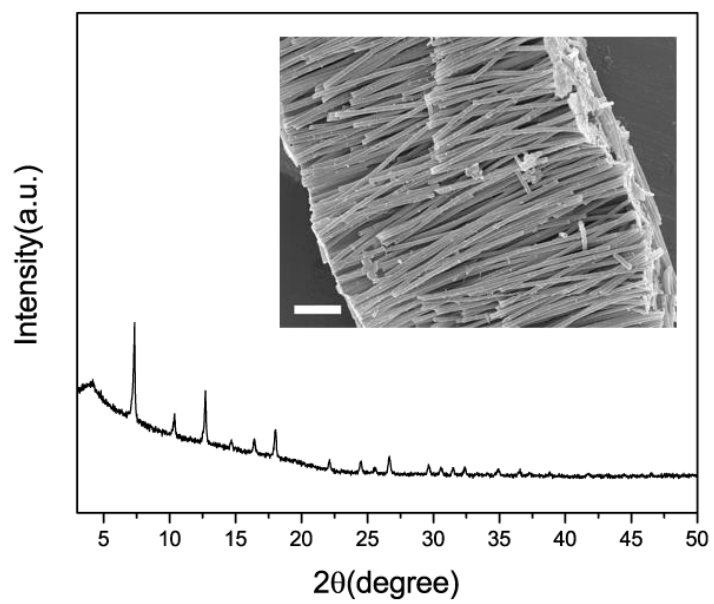

**Fig. S11.** XRD pattern and TEM image of ZIF-8@PDA nanotubes after heating treatment. The scale bar is 2 μm.

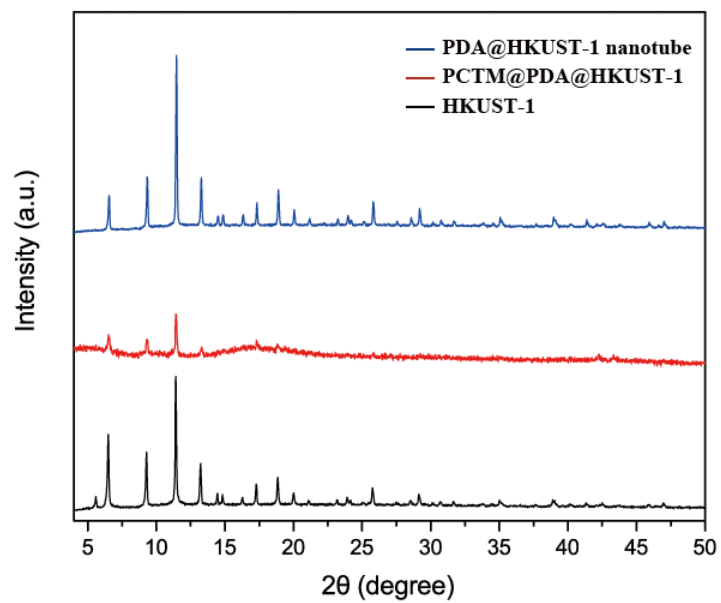

**Fig. S12.** XRD patterns of conventional HKUST-1 crystal (black), HKUST-1 deposited on PDA modified PCTM (red) and isolated 1D HKUST-1 nanotubes (blue).

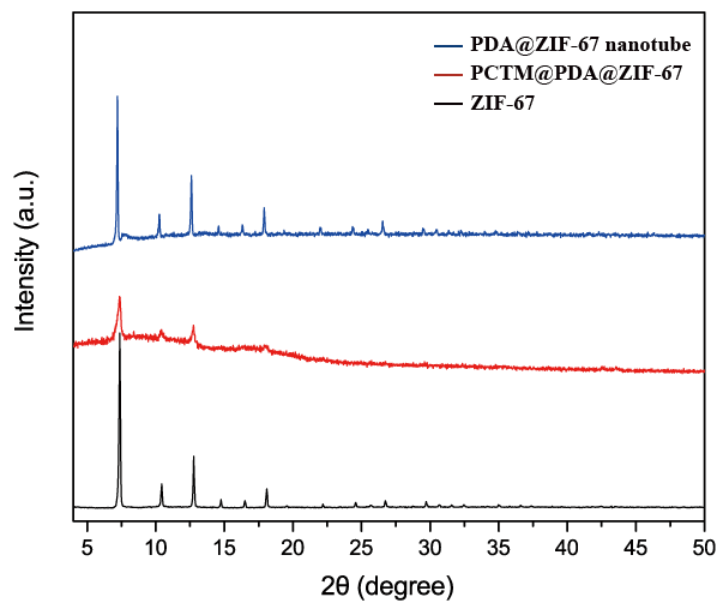

**Fig. S13.** XRD patterns of conventional ZIF-67 crystal (black), ZIF-67 deposited on PDA modified PCTM (red) and isolated 1D ZIF-67 nanotubes (blue).

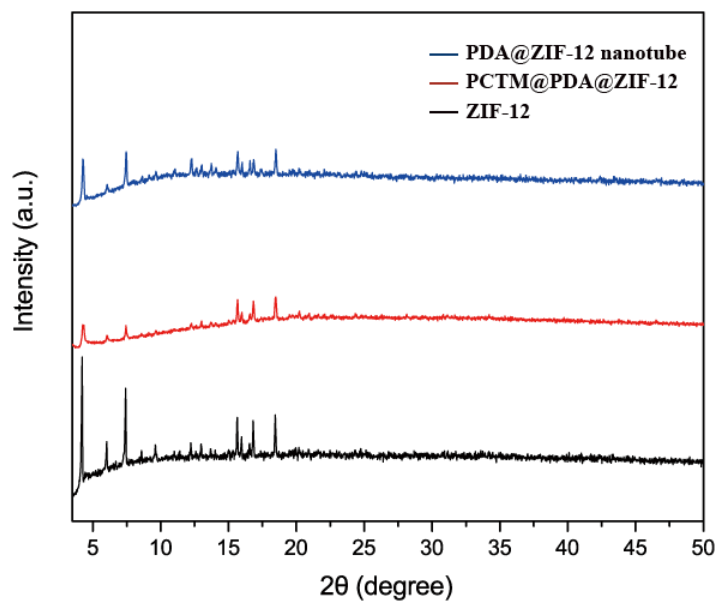

**Fig. S14.** XRD patterns of conventional ZIF-12 crystal (black), ZIF-12 deposited on PDA modified PCTM (red) and isolated 1D ZIF-12 nanotubes (blue).

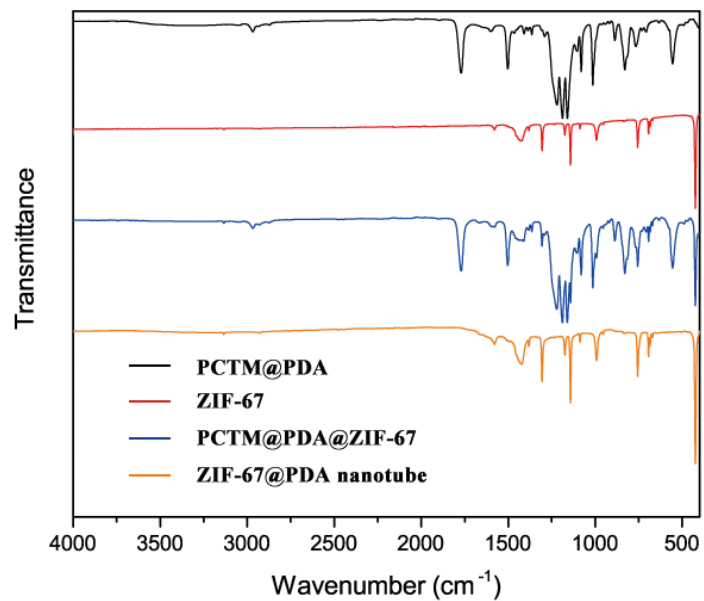

**Fig. S15.** FTIR spectra of PDA modified PCTM (black), conventional HKUST-1 crystal (red), HKUST-1 deposited on PDA modified PCTM (blue) and isolated 1D HKUST-1 nanotubes (orange).



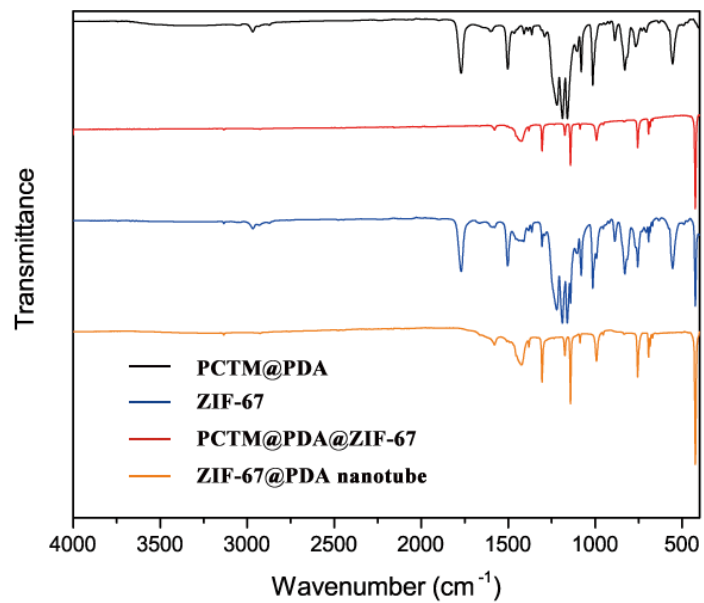

**Fig. S16.** FTIR spectra of PDA modified PCTM (black), conventional ZIF-67 crystal (red), ZIF-67 deposited on PDA modified PCTM (blue) and isolated 1D ZIF-67 nanotubes (orange).

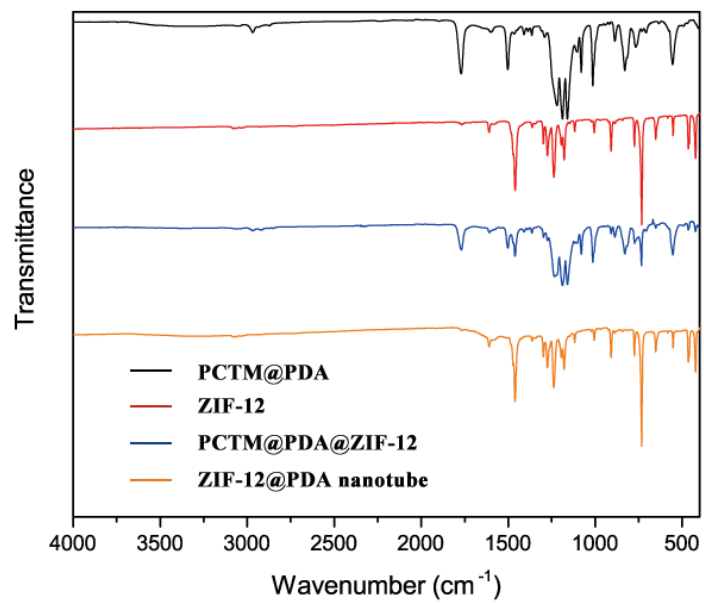

**Fig. S17.** FTIR spectra of PDA modified PCTM (black), conventional ZIF-12 crystal (red), ZIF-12 deposited on PDA modified PCTM (blue) and isolated 1D ZIF-12 nanotubes (orange).

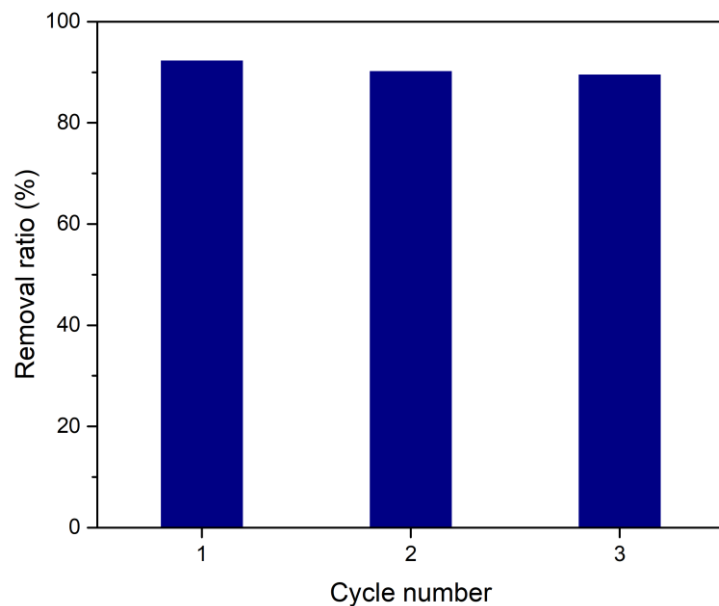

**Fig. S18.** Removal ratio of methylene blue in water by virgin and regenerated PCTM@PDA@ZIF-8 composite membranes in 3 cycles, concentration: 5 mg/L, flow rate: 3 mL/min, membrane area: 1.2 cm<sup>2</sup>, temperature: 298 K.

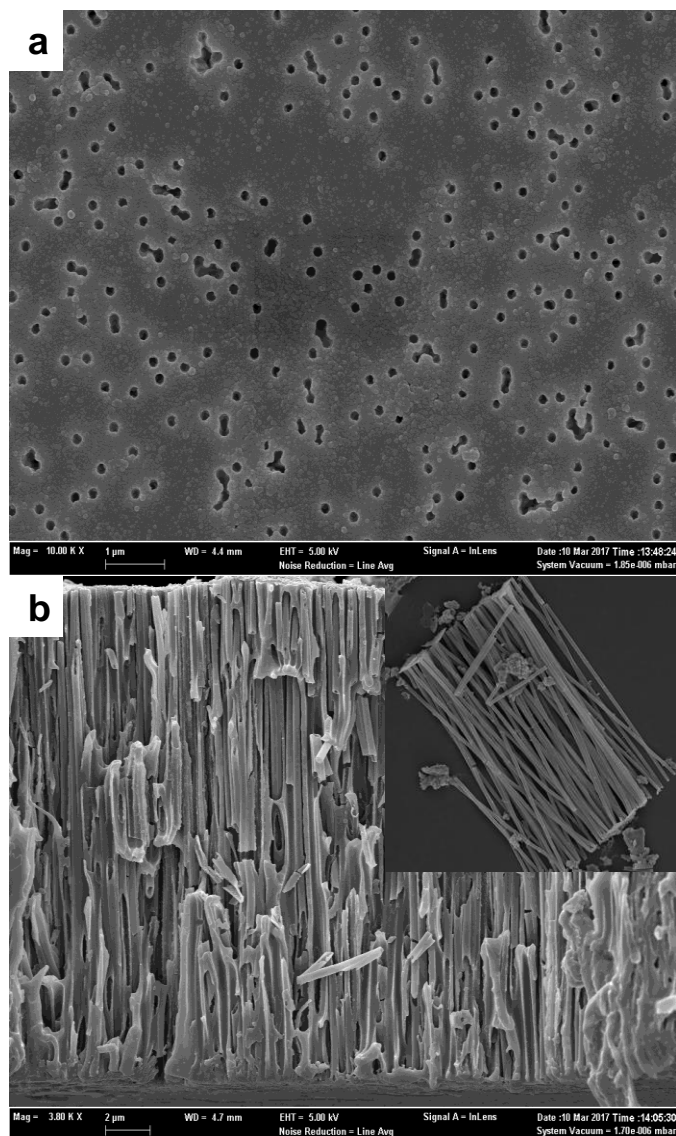

**Fig. S19.** Surface (a) and section (b) view SEM images of regenerated PCTM@PDA@ZIF-8. Inset is ZIF-8@PDA nanotubes prepared from (b).

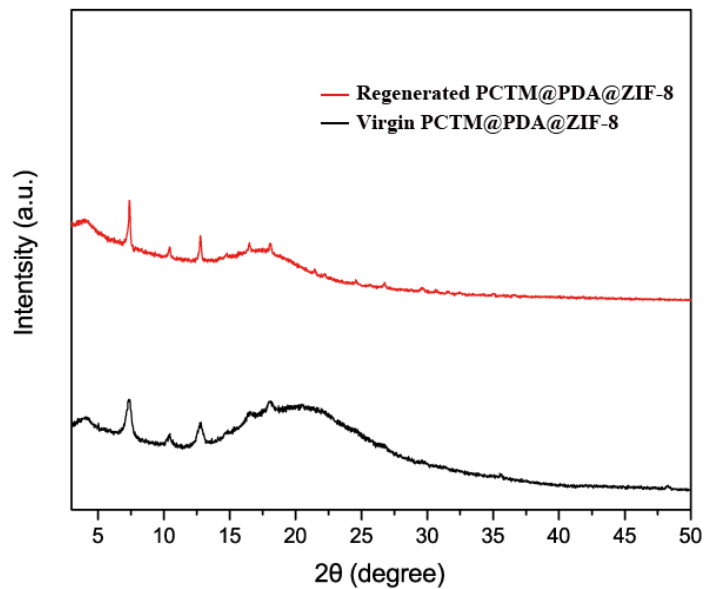

**Fig. S20.** XRD patterns of virgin (black) and regenerated (red) PCTM@PDA@ZIF-8 composite membranes.
